# Supplementary material for: LncRNA OIP5-AS1/cyrano suppresses GAK expression to control mitosis
Source: PubMed Central journal article supplement (PMC5564778; doi:10.18632/oncotarget.17219), 2017-04-19
Supplement: oncotarget-08-49409-s001.pdf [file oncotarget-08-49409-s001.pdf]

## LncRNA *OIP5-AS1/cyran* suppresses *GAK* expression to control mitosis

### SUPPLEMENTARY MATERIALS

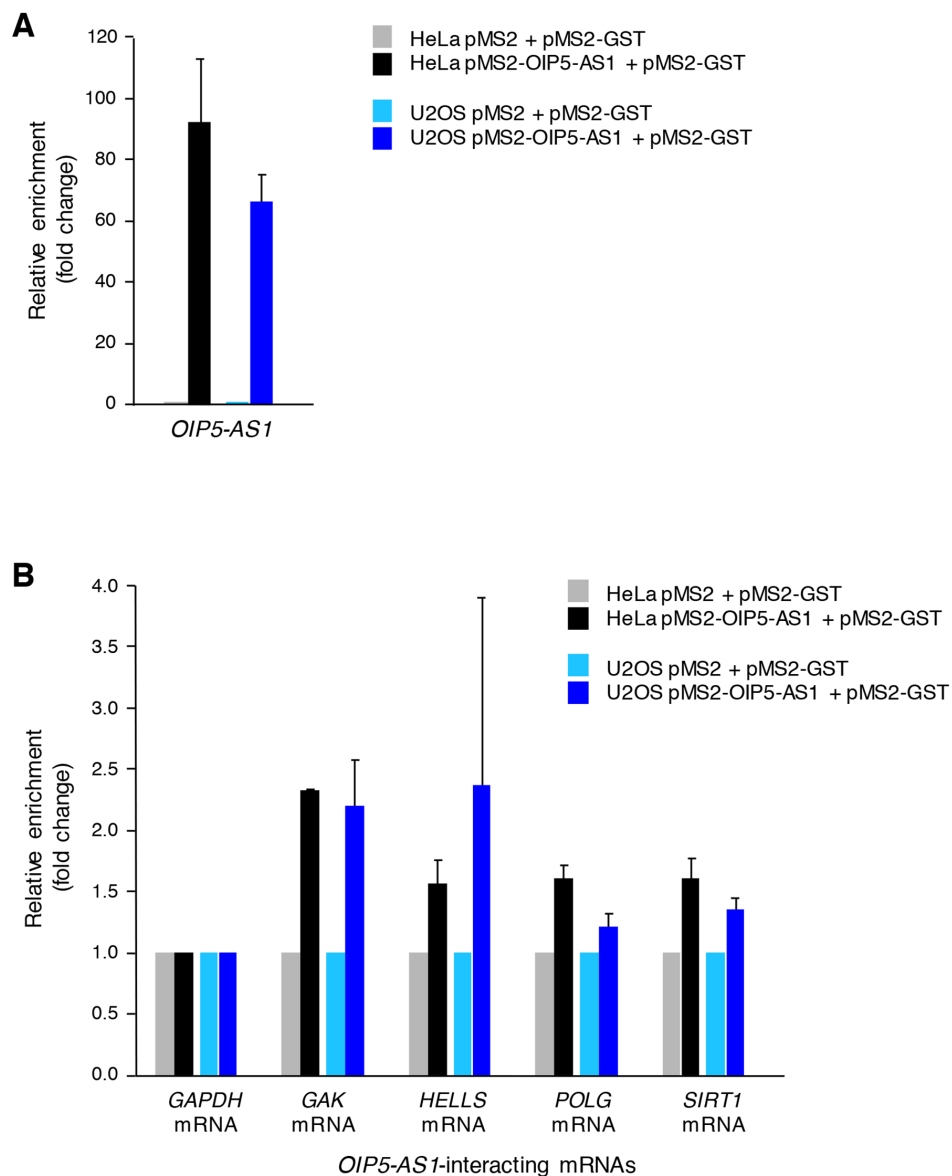

**Supplementary Figure 1: Assessment of the interaction of *OIP5-AS1* with target mRNAs in HeLa and U2OS cells using the MS2 RNA-tagging method.** (A) HeLa cells and U2OS cells were transfected with two expression vectors, one that transcribed the chimeric RNA *MS2-OIP5-AS1* (or a control vector that only expressed the *MS2* RNA hairpins) and one that expressed a *MS2-GST* fusion protein. GSH beads were then used to pull down the *MS2* complex from cell lysates, thereby capturing *MS2-OIP5-AS1* and molecules bound to it. Associated mRNAs were then identified by RT-qPCR analysis, including a negative control (*GAPDH* mRNA), a positive control (*GAK* mRNA), and other mRNAs that were found enriched by microarray analysis. Data are the means + S.E.M. from three independent experiments.

Supplementary Table 1:

See Supplementary File 1

Supplementary Table 2: siRNA duplexes used in this study

| siRNA (Provider)      | Sequence                                                          |
|-----------------------|-------------------------------------------------------------------|
| Ctrl siRNA (Qiagen)   | AATTCTCCGAACGTGTCACGT                                             |
| <i>OIP5-AS1</i> (IDT) | Sense1 rGrGrCrUrGrArGrUrUrUrCrArUrUrUrGrArArArCrArGrGTG           |
|                       | Antisense1 rCrArCrCrUrGrUrUrUrCrArArArUrGrArArArCrUrCrArGrCrCrUrU |
|                       | Sense2 rCrArUrGrCrArGrUrGrCrCrArUrCrUrGrArCrUrUrUrArUGG           |
|                       | Antisense2 rCrCrArUrArArArGrUrCrArGrArUrGrGrCrArCrUrGrCrArUrGrArG |
| <i>GAK</i> (IDT)      | Sense3 rCrArCrCrArArArCrArGrGrCrUrUrUrGrUrGrUrUrCrCrUTA           |
|                       | Antisense3 rUrArArGrGrArArCrArCrArArArGrCrCrUrGrUrUrUrGrGrUrGrGrU |
|                       | Sense1 rGrArGrArArCrUrUrGrUrUrGrCrUrUrArGrUrArArCrCrAAG           |
|                       | Antisense1 rCrUrUrGrGrUrUrArCrUrArArGrCrArArCrArArGrUrUrCrUrCrArA |
|                       | Sense2 rGrUrUrUrUrG rUrUrCrUrGrCrArGrCrGrUrCrUrArUrArGGA          |
|                       | Antisense2 rUrCrCrUrArUrArGrArCrGrCrUrGrCrArGrArArCrArArArCrUrG   |

**Supplementary Table 3: Primers for qPCR amplification**

| Oligomers         | Sequence                                                 |
|-------------------|----------------------------------------------------------|
| <i>OIP5-AS1-F</i> | TGCGAAGATGGCGGAGTAAG                                     |
| <i>OIP5-AS1-R</i> | TAGTTCCTCTCCTCTGGCCG                                     |
| <i>GAK-F</i>      | CACCAACCTCAAGGACACCT                                     |
| <i>GAK-R</i>      | TGACTCCACACCTTCTGCTG                                     |
| <i>GAK-2-F</i>    | CTGCAGGTGAACCCGGAGGAGC                                   |
| <i>GAK-2-R</i>    | CCAAGCTTCTAATACGACTCACTATAGGGAGAACCCCGTGTGGAAGTGAATCTGGA |
| <i>HELLS-F</i>    | AGAGGTCACAAGGTGCTGCT                                     |
| <i>HELLS-R</i>    | AAGACATGGACCCATCAAGC                                     |
| <i>POLG-F</i>     | CAACCCCTAGCTCTGACTGC                                     |
| <i>POLG-R</i>     | GAGGCAGCTTGAAAAACCAG                                     |
| <i>SIRT1-F</i>    | TCAGTGGCTGGAACAGTGAG                                     |
| <i>SIRT1-R</i>    | AGCGCCATGGAAAATGTAAC                                     |
| <i>GAPDH-F</i>    | TGCACCACCAACTGCTTAGC                                     |
| <i>GAPDH-R</i>    | GGCATGGACTGTGGTCATGAG                                    |
| <i>18S-F</i>      | CGAACGTCTGCCCTATCAACTT                                   |
| <i>18S-R</i>      | ACCCGTGGTCACCATGGTA                                      |

Forward (F) and reverse (R) primers used in this study are named by the transcript they amplify.

Supplementary Table 4: DNA oligomers

| DNA Oligomers       | Sequence                          |
|---------------------|-----------------------------------|
| GAK-biotin-AS1      | GCTGGTGCACCACCTCGGCGAT/3'biotin   |
| GAK-biotin-AS2      | ACCCCGTGTGGAAGTGAATCTGGA/3'biotin |
| GAK-biotin-AS3      | GCAGTCTCGGTCCAGGCAGCCCAT/3'biotin |
| GAK-biotin-AS4      | GCGGTGCAAACACCAGGGCCCATG/3'biotin |
| GAK-biotin-S1       | ATCGCCGAGGTGGTGCACCAGC/3'biotin   |
| GAK-biotin-S2       | TCCAGATTCAGTTCACACGGGGT/3'biotin  |
| GAK-biotin-S3       | ATGGGCTGCCTGGACCGAGACTGC/3'biotin |
| GAK-biotin-S4       | CATGGGCCCTGGTGTTCACCCGC/3'biotin  |
| OIP5-AS1-biotin-AS1 | CCGATATTTTTTTTCTTCTC/3'biotin     |
| OIP5-AS1-biotin-AS2 | GTTGAATTTGAGAGGCAGAAC/3'biotin    |
| OIP5-AS1-biotin-AS3 | TAGTATCTTTCACGTCAAAT/3'biotin     |
| OIP5-AS1-biotin-AS4 | ATTGTAATTATTTTTCTTAT/3'biotin     |
| OIP5-AS1-biotin-S1  | GAGAAGAAAAAAATATCGG/3'biotin      |
| OIP5-AS1-biotin-S2  | GTTCTGCCTCTCAAATTCAAC/3'biotin    |
| OIP5-AS1-biotin-S3  | ATTTGACGTGAAAGATACTA/3'biotin     |
| OIP5-AS1-biotin-S4  | ATAAGAAAAATAATTACAAT/3'biotin     |

Sense (S) and antisense (AS) biotinylated oligomers used to pull down *GAK* mRNA and *OIP5-AS1*.
